# Supplementary material for: Healthy and Chronic Kidney Disease (CKD) Dogs Have Differences in Serum Metabolomics and Renal Diet May Have Slowed Disease Progression
Source: MDPI journal article supplement (doi:10.3390/metabo11110782), 2021-11-16
Supplement: s1 [file s1]

## Article

# Healthy and chronic kidney disease (CKD) dogs have differences in serum metabolomics and renal diet may have slowed disease progression

Marcio Antonio Brunetto <sup>1,2</sup>, Bruna Ruberti <sup>3</sup>, Doris Pereira Halfen <sup>2</sup>, Douglas Segalla Caragelasco <sup>3</sup>, Thiago Henrique Annibale Vendramini <sup>1</sup>, Vivian Pedrinelli <sup>2</sup>, Henrique Tobar Macedo <sup>1</sup>, Juliana Toloi Jeremias <sup>4</sup>, Cristiana Fonseca Ferreira Pontieri <sup>4</sup>, Fernanda Maria Marins Ocampos <sup>5</sup>, Luiz Alberto Colnago<sup>5</sup>, Marcia Mery Kogika<sup>3,\*</sup>

<sup>1</sup> Pet Nutrology Research Center, Nutrition and Production Department, School of Veterinary Medicine and Animal Science, University of São Paulo, Jardim Elite, Pirassununga 13635-900, Brazil; mabrunetto@usp.br (M.A.B.); thiago.vendramini@usp.br (T.H.A.V.); henrique.tobar@hotmial.com (H.T.M.)

<sup>2</sup> Veterinary Nutrology Service, Veterinary Teaching Hospital, School of Veterinary Medicine and Animal Science, University of São Paulo, Cidade Universitária, São Paulo 05508-270, Brazil; dorisph2@yahoo.com.br (D.P.H.); vivian.pedrinelli@usp.br (V.P.)

<sup>3</sup> Small Animal Internal Medicine Service, Veterinary Teaching Hospital, School of Veterinary Medicine and Animal Science, University of São Paulo, Cidade Universitária, São Paulo 05508-270, Brazil; brunaruberti@usp.br (B.R.); mv.douglas@yahoo.com.br (D.S.C.)

<sup>4</sup> Nutrition Development Center, Grandfood Industria e Comercio LTDA (Premier Pet®), Dourado, São Paulo, Brazil; jjeremias@premierpet.com.br (J.T.J.); cristiana@premierpet.com.br (C.F.F.P.)

<sup>5</sup> Embrapa Instrumentação, R. 15 de Novembro, 1452, Centro, São Carlos, SP 13560-970, Brazil; fmmocampos@gmail.com (F.M.M.O.); luiz.colnago@embrapa.br (L.A.C.)

\* Correspondence: mabrunetto@usp.br (M.A.B.)

## Supplementary information

### Figures

- Figure S1.** Comparison between 1D NOESY-presat and 1D CPMG <sup>1</sup>H NMR spectra (600 MHz, 300 K) of the QC sample, indicating the chemical shifts of the main detected metabolites of dog's serum, demonstrating the effect of the T2 filter. .... 2
- Figure S2.** Periods, animals and experimental procedures that were performed in the study. .... 2
- Figure S3.** Expansion (6.0 - --.2 ppm) of HSQC correlation map (<sup>1</sup>H and <sup>13</sup>C at 600.13 and 150.90 MHz, respectively, 300 K) of the QC sample from dogs' serum .....**Erro! Indicador não definido.**
- Figure S4.** Expansion (6.0 - --.2 ppm) of HMBC correlation map (<sup>1</sup>H and <sup>13</sup>C at 600.13 and 150.90 MHz, respectively, 300 K) of the QC sample from dogs' serum. ....**Erro! Indicador não definido.**
- Figure S5.** Expansion (6.0 - --.2 ppm) of COSY correlation map (<sup>1</sup>H at 600.13 MHz, 300 K) of the QC sample from dogs' serum. ....**Erro! Indicador não definido.**

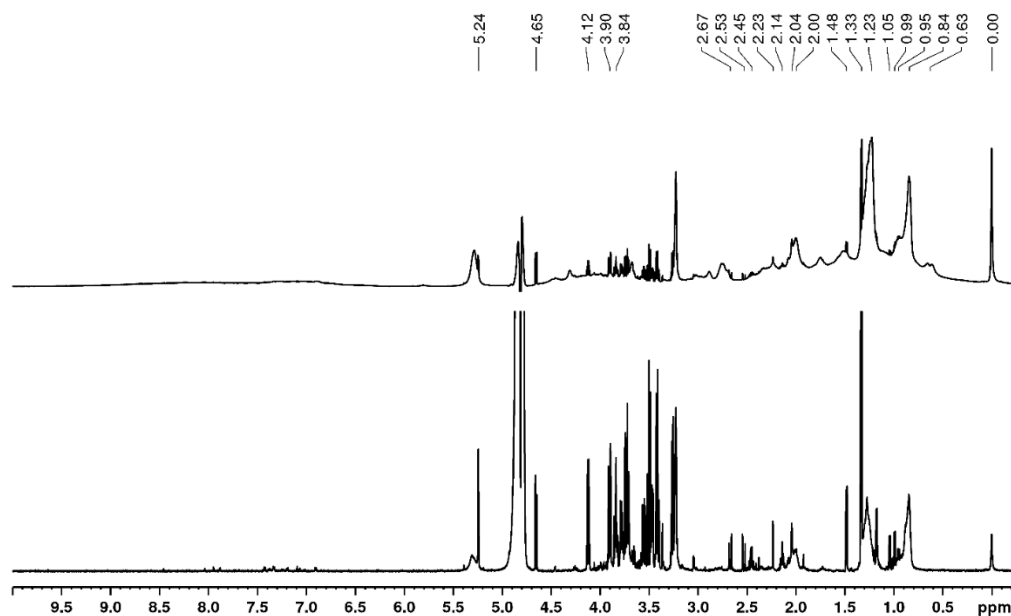

**Figure S1.** Comparison between 1D NOESY-presat and 1D CPMG  $^1\text{H}$  NMR spectra (600 MHz, 300 K) of the QC sample, indicating the chemical shifts of the main detected metabolites of dog's serum, demonstrating the effect of the T2 filter.

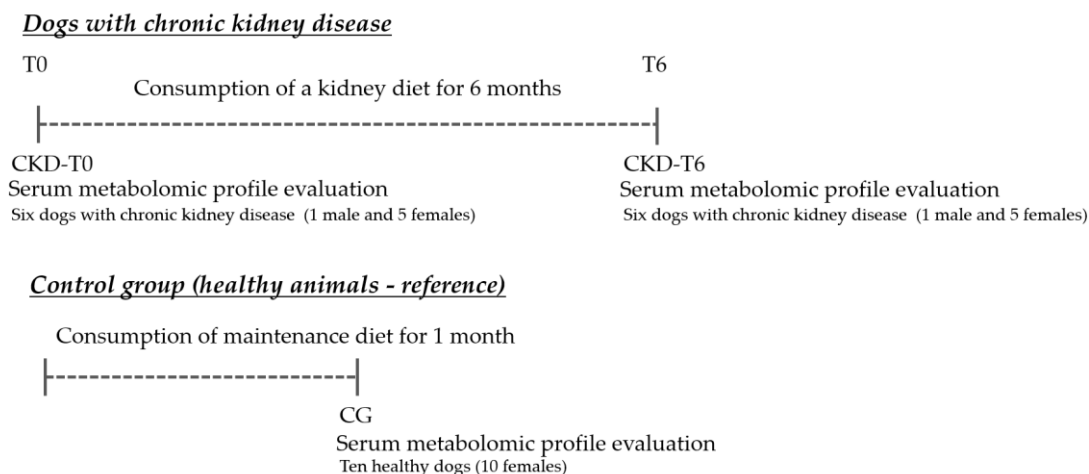

**Figure S2.** Periods, animals and experimental procedures that were performed in the study.

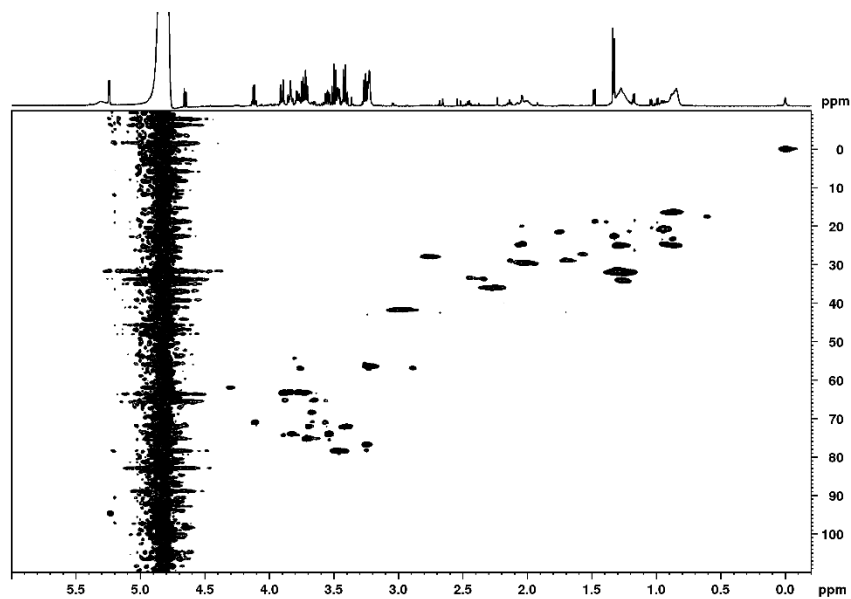

**Figure S3.** Expansion (6.0 - --.2 ppm) of HSQC correlation map ( $^1\text{H}$  and  $^{13}\text{C}$  at 600.13 and 150.90 MHz, respectively, 300 K) of the QC sample from dogs' serum

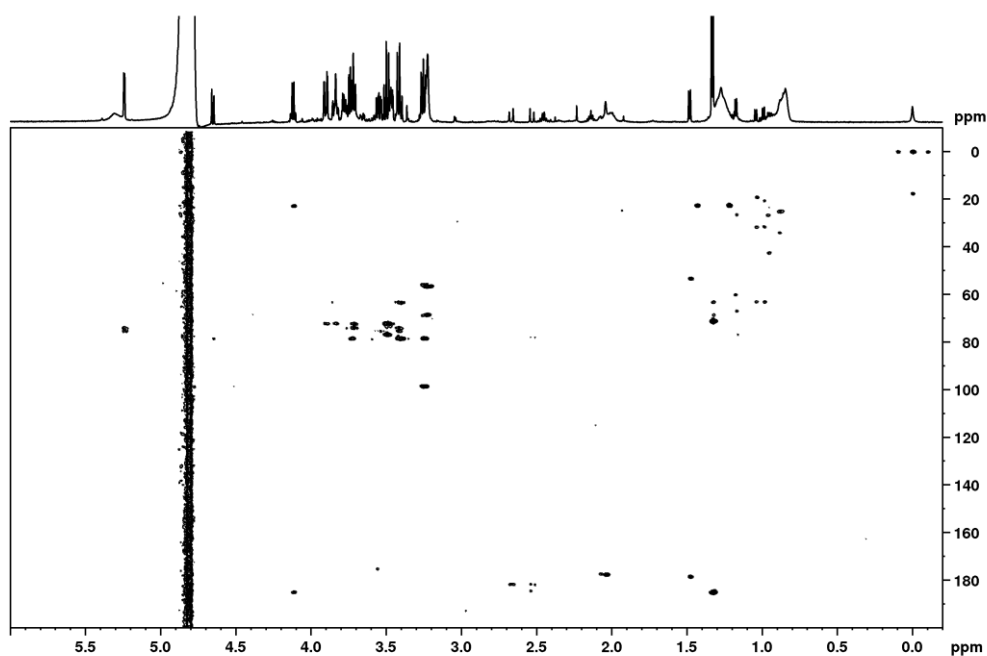

**Figure S4.** Expansion (6.0 - --.2 ppm) of HMBC correlation map ( $^1\text{H}$  and  $^{13}\text{C}$  at 600.13 and 150.90 MHz, respectively, 300 K) of the QC sample from dogs' serum.

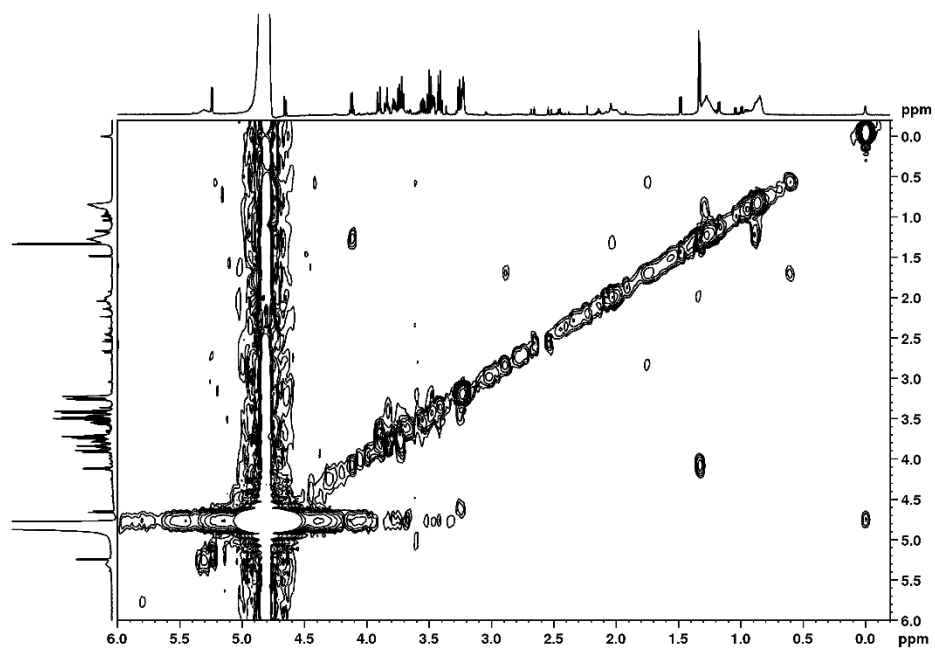

**Figure S5.** Expansion (6.0 – 0.2 ppm) of COSY correlation map ( $^1\text{H}$  at 600.13 MHz, 300 K) of the QC sample from dogs' serum.
